# Supplementary material for: Studies about the Dietary Impact on “Free” Glycation Compounds in Human Saliva
Source: MDPI journal article supplement (doi:10.3390/foods11142112), 2022-07-15
Supplement: s1 [file s1]

## Supplementary materials

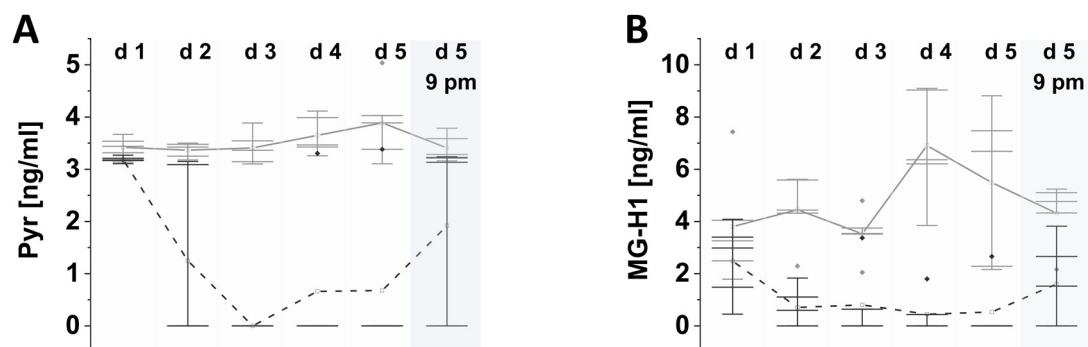

**Figure S1.** Impact of dietary MRP intake on salivary Pyr (A) and MG-H1 (B) concentrations, analyzed during a crossover-study with low and high MRP intake (grey: high MRP intake, black: low MRP intake). Shown are boxplots of salivary concentrations of individual MRPs in the morning of 5 consecutive days of five subjects with sampling at 7 am as well as the onset of eating the subjects' usual diet after four days of low MRP diet (d5 at 9 pm). Connected lines indicate data points of mean salivary MRP concentrations (low MRP diet: dashed black line versus high MRP diet: solid grey line). Outliers are indicated by a rhombus.

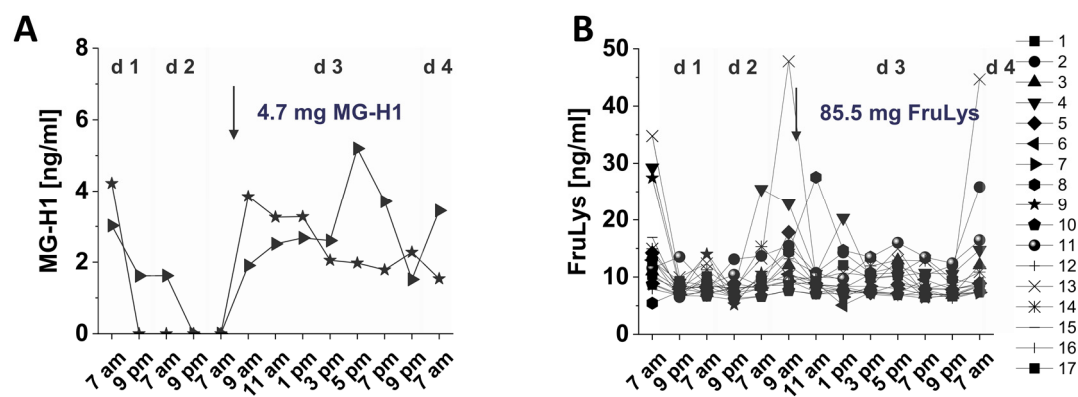

**Figure S2.** Impact of a high MRP intervention meal on salivary (A) MG-H1 and (B) FruLys concentrations during a three-days low MRP diet. Presented are the individual salivary of (A) MG-H1 and (B) FruLys concentrations for each of the (A: selected) subjects.

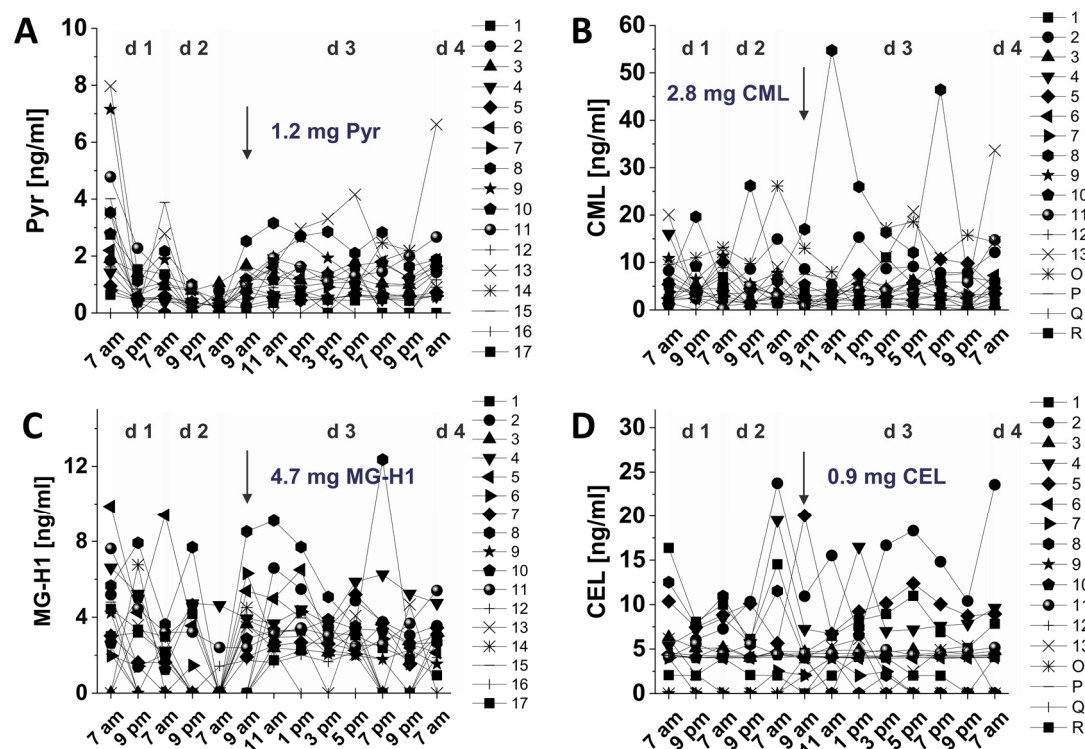

**Figure S3.** Impact of a high MRP intervention meal on salivary MRP concentrations during a three-days low MRP diet. Presented are the individual salivary (A) Pyr, (B) CML, (C) MG-H1 and (D) CEL concentrations for each of the subjects enrolled in the study.

**Table S1.** Raw data of Figure 1: Impact of dietary intake on salivary MRP concentration. “0” means no peak found during analysis, LOD means – peak height nearby the limit of detection.

| Subject | d1 high | d2 high | d3 high | d4 high | d5 high  | d1 low | d2 low | d3 low | d4 low | d5 low |
|---------|---------|---------|---------|---------|----------|--------|--------|--------|--------|--------|
| FruLys  |         |         |         |         |          |        |        |        |        |        |
| 1       | 8.8     | 8.4     | 6.5     | 10.2    | 17.0     | 8.9    | 6.9    | 6.3    | 6.0    | 6.4    |
| 2       | 7.4     | 8.0     | 5.9     | 6.9     | 9.6      | 8.2    | 6.2    | 7.1    | 5.7    | 5.8    |
| 3       | 22.4    | 17.7    | 16.5    | 30.1    | 23.5     | 15.6   | 9.0    | 13.4   | 8.8    | 16.1   |
| 4       | 18.2    | 14.6    | 12.2    | 27.6    | 21.2     | 13.2   | 13.2   | 13.3   | 16.1   | 18.5   |
| 5       | 8.8     | 12.1    | 8.5     | 12.6    | 8.9      | 7.0    | 6.0    | 7.9    | 7.6    | 6.9    |
| MG-H1   |         |         |         |         |          |        |        |        |        |        |
| 5       | 2.5     | 4.3     | 2.0     | 3.8     | 2.3      | 0.4    | 0      | 0      | 0      | 0      |
| 1       | 4.0     | 5.6     | 3.7     | 6.2     | 7.5      | 3.0    | 1.8    | 0.6    | 0      | 0      |
| 2       | 1.8     | 4.4     | 3.5     | 6.4     | 8.8      | 3.4    | 1.1    | 0      | 0      | 0      |
| 3       | 7.4     | 1.6     | 3.5     | 9.0     | 6.7      | 1.5    | 0.6    | 3.4    | 1.8    | 2.7    |
| 4       | 3.3     | 5.6     | 4.8     | 9.1     | (1.6)LOD | 4.1    | 0      | 0      | 0.4    | 0      |
| CEL     |         |         |         |         |          |        |        |        |        |        |
| 1       | 5.2     | 3.5     | 4.8     | 5.1     | 9.7      | 4.9    | 6.1    | 4.9    | 5.2    | 4.9    |
| 2       | 6.2     | 6.0     | 3.7     | 4.2     | 7.7      | 3.2    | 2.4    | 4.3    | 4.3    | 5.1    |
| 3       | 18.0    | 17.3    | 10.9    | 11.7    | 17.9     | 11.1   | 6.2    | 9.9    | 7.0    | 8.7    |
| 4       | 7.2     | 6.0     | 2.8     | 7.3     | 6.1      | 2.5    | 9.8    | 8.6    | 13.3   | 10.7   |
| 5       | 6.8     | 13.8    | 8.4     | 17.6    | 9.9      | 5.3    | 4.9    | 6.9    | 2.4    | 6.3    |
| CML     |         |         |         |         |          |        |        |        |        |        |
| 1       | 4.0     | 2.8     | 3.6     | 3.4     | 6.8      | 3.2    | 3.9    | 4.1    | 4.1    | 4.9    |
| 2       | 5.2     | 3.3     | 2.5     | 2.1     | 4.4      | 3.3    | 4.1    | 4.7    | 4.4    | 3.8    |
| 3       | 3.3     | 2.8     | 2.2     | 3.4     | 4.8      | 4.3    | 3.1    | 6.1    | 4.8    | 5.9    |

|     |     |     |     |     |     |     |     |     |     |     |
|-----|-----|-----|-----|-----|-----|-----|-----|-----|-----|-----|
| 4   | 5.4 | 4.6 | 3.2 | 8.0 | 5.7 | 4.2 | 5.6 | 3.3 | 8.8 | 7.0 |
| 5   | 4.0 | 5.1 | 3.8 | 5.9 | 5.0 | 2.5 | 3.2 | 3.2 | 8.8 | 5.5 |
| Pyr |     |     |     |     |     |     |     |     |     |     |
| 1   | 3.4 | 3.3 | 3.1 | 3.4 | 4.0 | 3.3 | 3.1 | 0   | 0   | 0   |
| 2   | 3.1 | 3.2 | 3.1 | 3.3 | 3.4 | 3.2 | 0   | 0   | 0   | 0   |
| 3   | 3.3 | 3.5 | 3.9 | 4.1 | 3.9 | 3.1 | 0   | 0   | 0   | 0   |
| 4   | 3.5 | 3.5 | 3.5 | 4.0 | 5.0 | 3.2 | 3.1 | 0   | 3.3 | 3.4 |
| 5   | 3.7 | 3.4 | 3.4 | 3.5 | 3.1 | 3.2 | 0   | 0   | 0   | 0   |

**Table S2.** Raw data of the intervention study (Figures 3, 4 and S2, S3): Impact of a high MRP intervention meal on salivary MRP concentrations during a three-days low MRP diet. “0” means no peak found during analysis.

| Subject  | 13   | 2    | 3    | 14   | 12   | 6    | 9   | 8    | 7    | 17  | 11   | 5   | 1    | 4    | 15   | 16   | 10   |
|----------|------|------|------|------|------|------|-----|------|------|-----|------|-----|------|------|------|------|------|
| CEL      |      |      |      |      |      |      |     |      |      |     |      |     |      |      |      |      |      |
| 7:00 AM  | 16.4 |      | 6.3  | 5.4  | 10.4 | 4.4  | 4.0 | 12.5 | 0    | 4.3 | 4.1  | 4.5 | 6.2  | 0    | 4.3  | 4.1  | 2.1  |
| 9:00 PM  | 8.1  | 6.0  | 5.1  | 7.1  | 7.4  | 4.1  | 0   | 7.7  | 0    | 4.0 | 5.6  | 4.3 | 2.2  | 0    | 4.0  | 4.1  | 2.0  |
| 7:00 AM  | 10   | 7.3  | 5.1  | 8.5  | 8.8  | 4.0  | 0   | 11.0 | 0    | 4.2 | 4.4  | 4.2 | 0    | 0    | 5.4  | 4.0  | 4.0  |
| 9:00 PM  | 6.1  | 10.3 | 4.0  | 5.7  | 10.1 | 4.0  | 0   | 5.5  | 0    | 4.0 | 5.5  | 4.2 | 0    | 0    | 4.0  | 4.0  | 2.1  |
| 7:00 AM  | 14.5 | 23.7 | 4.8  | 19.5 | 5.7  | 4.7  | 2.5 | 11.5 | 0    | 4.3 | 4.4  | 4.3 | 0    | 0    | 4.1  |      | 2.0  |
| 9:00 AM  | 4.6  | 10.9 | 4.7  | 7.2  | 20.1 | 4.0  | 2.0 | 4.1  | 2.0  | 4.0 | 4.5  | 4.2 | 4.1  | 0    | 4.2  | 0    | 0    |
| 11:00 AM | 6.5  | 15.5 | 4.9  | 6.7  | 6.7  | 4.1  | 4.0 | 0    | 4.0  | 0   | 4.5  | 4.1 | 5.3  | 0    | 4.1  | 4.0  | 2.0  |
| 1:00 PM  | 8.2  | 6.6  | 4.9  | 16.5 | 9.2  | 4.0  | 2.0 | 7.4  | 4.1  | 0   | 4.5  | 4.3 | 6.1  |      | 4.1  | 0    | 4.1  |
| 3:00 PM  | 8.9  | 16.7 | 4.7  | 7.0  | 10.1 | 4.0  | 2.5 | 2.0  | 4.1  | 0   | 4.9  | 4.2 | 0    | 0    |      | 2.1  | 4.0  |
| 5:00 PM  | 11.0 | 18.3 | 4.9  | 7.2  | 12.4 | 4.0  | 0   | 0    | 4.3  | 0   | 4.3  | 4.2 | 2.5  | 0    | 4.1  | 0    | 2.0  |
| 7:00 PM  | 6.9  | 14.8 | 4.7  | 7.6  | 10   | 4.0  | 0   | 0    | 4.2  | 0   | 4.6  | 4.3 | 4.9  | 0    | 4.0  |      | 2.0  |
| 9:00 PM  | 5.1  | 10.4 | 4.4  | 7.8  | 8.7  | 4.0  | 0   | 0    | 4.1  | 0   | 4.8  | 4.3 | 5.3  | 0    | 4.0  | 0    | 0    |
| 7:00 AM  | 7.8  | 23.6 | 4.8  | 9.6  | 8.9  | 4.1  | 0   | 0    | 4.3  | 0   | 5.2  | 4.4 | 0    | 0    | 4.2  | 0    | 4.1  |
| MG-H1    |      |      |      |      |      |      |     |      |      |     |      |     |      |      |      |      |      |
| 7:00 AM  | 3.0  | 5.2  | 0    | 6.6  | 9.9  | 2.0  | 3.0 | 5.7  | 4.2  | 2.6 | 7.6  | 2.1 | 0    | 0    | 4.8  | 2.5  | 4.4  |
| 9:00 PM  | 3.2  | 1.4  | 0    | 5.2  | 4.3  | 1.4  | 1.6 | 7.9  | 0    | 5.0 | 4.4  | 0   | 3.6  | 6.8  | 0    | 0    | 3.3  |
| 7:00 AM  | 2.0  | 2.1  | 0    | 2.2  | 9.4  | 0    | 1.6 | 3.6  | 0    | 1.2 | 3.2  | 2.9 | 1.9  | 0    | 0    | 0    | 3.0  |
| 9:00 PM  | 0    | 0    | 0    | 4.7  | 3.6  | 1.5  | 0   | 7.7  | 0    | 4.7 | 3.2  | 0   | 0    | 0    | 0    | 0    | 4.2  |
| 7:00 AM  | 0    | 0    | 0    | 4.6  | 0    | 0    | 0   | 0    | 0    | 0   | 2.4  | 1.4 | 0    | 0    | 0    |      | 0    |
| 9:00 AM  | 0    | 0    | 3.6  | 3.9  | 5.4  | 6.3  | 1.9 | 8.5  | 3.8  | 2.9 | 2.4  | 1.7 | 3.5  | 4.5  | 0    | 0    | 0    |
| 11:00 AM | 1.7  | 6.6  | 2.4  | 3.7  | 5.0  | 2.7  | 2.5 | 9.1  | 3.3  | 3.3 | 3.1  | 1.6 | 2.9  | 3.4  | 5.1  | 2.2  | 2.6  |
| 1:00 PM  | 2.3  | 5.5  | 2.3  | 4.4  | 6.5  | 4.3  | 2.7 | 7.7  | 3.3  | 3.3 | 3.4  | 2.0 | 3.0  |      | 4.0  | 0    | 4.3  |
| 3:00 PM  | 3.2  | 3.5  | 2.1  | 3.6  | 2.6  | 2.2  | 2.6 | 5.1  | 2.1  | 3.9 | 3.0  | 1.7 | 0    | 3.6  |      | 0    | 2.7  |
| 5:00 PM  | 3.0  | 4.9  | 3.2  | 5.9  | 2.3  | 2.1  | 5.2 | 3.5  | 2.0  | 3.4 | 2.5  | 2.2 | 4.1  | 2.0  | 2.6  | 0    | 3.5  |
| 7:00 PM  | 2.4  | 3.8  | 0    | 6.3  | 3.6  | 2.9  | 3.7 | 12.4 | 1.8  | 3.3 | 2.6  | 1.8 | 0    | 0    | 0    |      | 0    |
| 9:00 PM  | 1.8  | 3.0  | 0    | 5.2  | 2.6  | 1.6  | 1.5 | 2.6  | 2.3  | 2.6 | 3.7  | 0   | 4.7  | 0    | 0    | 0    | 0    |
| 7:00 AM  | 0.9  | 3.6  | 3.2  | 4.7  | 2.1  | 3.0  | 3.4 | 2.7  | 1.5  | 3.0 | 5.4  | 1.9 | 0    | 0    | 0    | 0    | 2.7  |
| FruLys   |      |      |      |      |      |      |     |      |      |     |      |     |      |      |      |      |      |
| 7:00 AM  | 10.4 | 13.1 | 11.0 | 29.3 | 14.2 | 13.0 | 8.8 | 5.4  | 27.4 | 8.7 | 11.6 | 7.9 | 34.8 | 14.9 | 16.9 | 9.9  | 12.7 |
| 9:00 PM  | 7.3  | 6.5  | 7.9  | 9.0  | 8.3  | 7.9  | 7.0 | 7.5  | 8.5  | 6.8 | 13.5 | 6.8 | 10   | 7.9  | 6.8  | 7.9  | 9.3  |
| 7:00 AM  | 10.1 | 7.7  | 7.3  | 7.0  | 8.1  | 8.4  | 7.3 | 9.1  | 14.0 | 6.7 | 8.6  | 9.9 | 12.4 | 11.3 | 14.2 | 8.5  | 8.5  |
| 9:00 PM  | 7.1  | 13.1 | 8.0  | 8.1  | 8.9  | 8.1  | 6.6 | 7.0  | 5.1  | 6.0 | 10.4 | 6.2 | 8.2  | 7.7  | 7.3  | 6.5  | 8.1  |
| 7:00 AM  | 9.8  | 13.7 | 8.3  | 25.5 | 8.0  | 8.5  | 8.1 | 9.7  | 10.7 | 6.6 | 8.4  | 6.7 | 13.2 | 15.3 | 8.0  |      | 8.5  |
| 9:00 AM  | 9.4  | 15.5 | 12.1 | 22.9 | 17.8 | 10.5 | 9.2 | 14.4 | 14.5 | 7.6 | 9.3  | 7.7 | 47.8 | 10.2 | 13.2 | 10.5 | 8.6  |
| 11:00 AM | 7.3  | 10.7 | 8.7  | 10.5 | 8.9  | 9.0  | 8.5 | 27.6 | 8.7  | 7.1 | 10.1 | 6.9 | 9.7  | 9.5  | 10.7 | 8.3  | 9.3  |
| 1:00 PM  | 8.0  | 14.3 | 8.4  | 20.3 | 7.6  | 5.1  | 6.5 | 14.7 | 8.3  | 7.2 | 9.7  | 7.9 | 10.8 |      | 9.4  | 7.6  | 12.1 |
| 3:00 PM  | 10.5 | 10.7 | 8.4  | 9.7  | 7.2  | 7.3  | 8.4 | 13.5 | 7.3  | 7.3 | 13.4 | 7.0 | 10.1 | 11.9 |      | 7.5  | 9.8  |

|          |      |      |      |      |      |     |     |      |      |     |      |     |      |      |     |     |      |
|----------|------|------|------|------|------|-----|-----|------|------|-----|------|-----|------|------|-----|-----|------|
| 5:00 PM  | 10.7 | 11.8 | 12.9 | 10.2 | 8.7  | 7.2 | 8.0 | 10.5 | 6.8  | 6.9 | 16.0 | 6.7 | 14.9 | 12.9 | 9.1 | 7.1 | 10.3 |
| 7:00 PM  | 7.8  | 10.3 | 7.0  | 10.7 | 7.9  | 9.5 | 7.0 | 13.3 | 6.3  | 6.9 | 13.5 | 7.6 | 7.9  | 12.9 | 8.1 |     | 6.5  |
| 9:00 PM  | 6.6  | 12.0 | 6.9  | 10.5 | 7.8  | 7.9 | 6.9 | 9.6  | 6.9  | 7.0 | 12.4 | 6.2 | 9.0  | 8.6  | 7.9 | 6.4 | 6.7  |
| 7:00 AM  | 8.5  | 25.8 | 12.1 | 14.7 | 8.9  | 8.9 | 7.3 | 8.8  | 8.6  | 7.4 | 16.4 | 7.4 | 44.7 | 10.9 | 8.6 | 7.5 | 8.4  |
| Pyr      |      |      |      |      |      |     |     |      |      |     |      |     |      |      |     |     |      |
| 7:00 AM  | 0.6  | 1.8  | 1.9  | 1.4  | 0.9  | 2.2 | 0.8 | 3.5  | 7.2  | 2.8 | 4.8  | 1.6 | 8.0  | 3.5  | 4.0 | 0   | 2.8  |
| 9:00 PM  | 0.4  | 0.5  | 1.4  | 0.4  | 0.5  | 0.6 | 0.5 | 1.1  | 0.5  | 0.4 | 2.3  | 0.8 | 1.4  | 0    | 0   | 0   | 1.5  |
| 7:00 AM  | 0.5  | 0.5  | 0.9  | 0.4  | 0.6  | 1.0 | 0.5 | 2.2  | 1.9  | 0   | 1.3  | 1.1 | 2.8  | 0.8  | 3.9 | 0   | 1.4  |
| 9:00 PM  | 0.4  | 0    | 0.8  | 0.4  | 0.4  | 0.8 | 0.2 | 1.0  | 0    | 0   | 0.9  | 0   | 0.1  | 0    | 0   | 0   | 0    |
| 7:00 AM  | 0.3  | 0.8  | 1.0  | 0.2  | 0.2  | 0.5 | 0.4 | 0    | 0    | 0   | 0    | 0   | 0.7  | 0    | 0   |     | 0    |
| 9:00 AM  | 0.2  | 0.3  | 1.7  | 0.9  | 0.7  | 1.1 | 0.5 | 2.5  | 1.2  | 1.2 | 0.9  | 0.8 | 1.0  | 0    | 1.5 | 0   | 0    |
| 11:00 AM | 0.4  | 0.5  | 1.3  | 0.6  | 0.6  | 1.6 | 0.6 | 3.2  | 2.0  | 1.2 | 1.9  | 1.0 | 1.6  | 0    | 0.9 | 0   | 1.8  |
| 1:00 PM  | 0.5  | 0.6  | 1.1  | 0.8  | 0.4  | 1.2 | 0.6 | 2.7  | 2.6  | 1.6 | 1.6  | 0.9 | 3.0  |      | 1.7 | 0   | 0.8  |
| 3:00 PM  | 0.5  | 0.5  | 1.4  | 0.5  | 0.5  | 1.1 | 0.9 | 2.8  | 1.9  | 1.4 | 1.1  | 1.1 | 3.3  | 0    |     | 0.6 | 0    |
| 5:00 PM  | 0.4  | 0.6  | 1.8  | 0.6  | 0.6  | 1.7 | 0.8 | 2.1  | 1.2  | 1.0 | 1.3  | 1.1 | 4.2  | 0.9  | 1.5 | 0   | 1.6  |
| 7:00 PM  | 0.5  | 0.6  | 1.0  | 0.5  | 0.5  | 1.8 | 0.7 | 2.8  | 1.0  | 1.8 | 1.4  | 0.7 | 1.8  | 2.5  | 0   |     | 0    |
| 9:00 PM  | 0.4  | 0.7  | 1.0  | 0.5  | 0.6  | 1.2 | 0.6 | 1.6  | 0.9  | 1.2 | 2.0  | 0   | 2.2  | 2.2  | 0   | 0   | 0    |
| 7:00 AM  | 0.6  | 1.4  | 1.8  | 0.6  | 0.7  | 1.9 | 0.6 | 1.9  | 1.5  | 1.6 | 2.7  | 1.2 | 6.6  | 0.9  | 1.3 | 0   | 0    |
| CML      |      |      |      |      |      |     |     |      |      |     |      |     |      |      |     |     |      |
| 7:00 AM  | 5.2  | 8.3  | 2.1  | 16.0 | 5.4  | 2.5 | 3.8 | 5.8  | 10.9 | 0.9 | 2.1  | 1.5 | 20.1 | 9.5  | 6.0 | 7.3 | 2.3  |
| 9:00 PM  | 3.2  | 4.4  | 5.3  | 2.5  | 3.6  | 2.4 | 4.0 | 19.6 | 6.5  | 9.2 | 2.4  | 0.1 | 2.7  | 11.0 | 3.4 | 4.0 | 3.6  |
| 7:00 AM  | 2.4  | 4.5  | 0.8  | 3.4  | 10.1 | 1.7 | 2.9 | 5.1  | 11.4 | 0.1 | 0.2  | 4.3 | 12.2 | 13.2 | 9.0 | 7.6 | 6.9  |
| 9:00 PM  | 1.2  | 8.6  | 1.4  | 3.6  | 4.5  | 1.6 | 1.5 | 26.2 | 5.5  | 4.9 | 5.0  | 1.4 | 2.7  | 9.8  | 6.0 | 2.3 | 0.6  |
| 7:00 AM  | 1.5  | 14.9 | 3.1  | 5.8  | 3.4  | 2.4 | 3.4 | 6.1  | 7.7  | 1.4 | 2.9  | 1.0 | 9.1  | 26.1 | 2.7 |     | 6.5  |
| 9:00 AM  | 1.3  | 8.6  | 2.0  | 0.6  | 2.9  | 1.6 | 2.1 | 17.0 | 2.2  | 5.3 | 0.6  | 1.8 | 0    | 13.0 | 7.5 | 0   | 3.9  |
| 11:00 AM | 0.1  | 5.3  | 2.4  | 1.4  | 3.1  | 2.2 | 3.7 | 54.7 | 1.4  | 2.9 | 3.8  | 0.7 | 2.3  | 8.0  | 6.5 | 3.5 | 4.5  |
| 1:00 PM  | 0    | 15.3 | 1.7  | 3.5  | 7.4  | 5.5 | 2.9 | 26.0 | 1.2  | 1.8 | 4.2  | 1.1 | 5.6  |      | 0   | 6.0 | 3.4  |
| 3:00 PM  | 1.4  | 8.7  | 3.3  | 2.0  | 4.4  | 2.6 | 2.9 | 16.3 | 1.4  | 2.6 | 4.0  | 1.1 | 11.2 | 17.3 |     | 5.2 | 11.1 |
| 5:00 PM  | 1.5  | 9.2  | 6.1  | 2.6  | 5.7  | 2.0 | 6.1 | 12.1 | 0.5  | 4.0 | 4.0  | 1.2 | 20.8 | 18.6 | 4.2 | 9.6 | 5.3  |
| 7:00 PM  | 0.7  | 7.8  | 2.8  | 2.9  | 10.7 | 3.1 | 4.9 | 46.4 | 0    | 2.8 | 5.9  | 1.0 | 1.4  | 11.0 | 7.3 |     | 6.2  |
| 9:00 PM  | 0    | 8.0  | 1.1  | 2.8  | 9.8  | 2.5 | 3.2 | 6.9  | 0.1  | 0.2 | 5.8  | 0.9 | 4.5  | 15.8 | 7.7 | 0   | 1.9  |
| 7:00 AM  | 1.4  | 12.1 | 4.2  | 2.7  | 4.6  | 7.3 | 3.4 | 6.1  | 2.8  | 0.2 | 14.8 | 2.1 | 33.6 | 14.3 | 3.3 | 6.2 | 4.6  |

**Table S3.** Raw data of Figure 5: Concentrations of protein-bound FruLys and CML in the salivary protein fraction of five subjects during low or high MRP diet, related to lysine.

| FL<br>[µg/g Lys] | CML<br>[µg/g Lys] | Subject | Dietary style |
|------------------|-------------------|---------|---------------|
| 7.0              | 6.3               | 5       | high          |
| 4.8              | 3.7               | 5       | low           |
| 5.4              | 4.8               | 4       | high          |
| 5.0              | 5.6               | 4       | low           |
| 3.1              | 4.6               | 3       | high          |
| 3.8              | 4.8               | 3       | low           |
| 2.3              | 3.2               | 2       | high          |
| 3.2              | 4.4               | 2       | low           |
| 2.1              | 2.4               | 1       | high          |
| 3.0              | 4.2               | 1       | low           |
